**Abstract #: 279****GWAS of heart rate in 87,759 Chinese subjects highlighted its genetic correlations with cardiometabolic traits**

Songchun Yang<sup>1</sup>, Canqing Yu<sup>1</sup>, Yu Guo<sup>2</sup>, Zheng Bian<sup>2</sup>, Robin G. Walters<sup>3,4</sup>, Iona Y. Millwood<sup>3,4</sup>, Ling Yang<sup>3,4</sup>, Yiping Chen<sup>3,4</sup>, Huaidong Du<sup>3,4</sup>, Junshi Chen<sup>5</sup>, Zhengming Chen<sup>4</sup>, Dalin Li<sup>6,7</sup>, Jun Lv<sup>1,8,9</sup>, Liming Li<sup>1</sup>

<sup>1</sup>Department of Epidemiology and Biostatistics, School of Public Health, Peking University Health Science Center, Beijing, China, <sup>2</sup>Chinese Academy of Medical Sciences, Beijing, China, <sup>3</sup>Medical Research Council Population Health Research Unit at the University of Oxford, Oxford, United Kingdom, <sup>4</sup>Clinical Trial Service Unit & Epidemiological Studies Unit (CTSU), Nuffield Department of Population Health, University of Oxford, Oxford, United Kingdom, <sup>5</sup>China National Center for Food Safety Risk Assessment, Beijing, China, <sup>6</sup>Inflammatory Bowel & Immunobiology Research Institute, Cedars Sinai Medical Center, Los Angeles, USA, <sup>7</sup>David Geffen School of Medicine, University of California, Los Angeles, USA, <sup>8</sup>Key Laboratory of Molecular Cardiovascular Sciences (Peking University), Ministry of Education, Beijing, China, <sup>9</sup>Peking University Institute of Environmental Medicine, Beijing, China

**Background:** Resting heart rate (RHR) has been associated with risks of mortality and multiple chronic diseases. Previous studies, predominantly conducted in Europeans, have reported 91 independent variants associated with RHR and its genetic correlations with several cardiometabolic traits. Studies from East Asians are lacking.

**Methods:** We performed a GWAS for RHR in 87,701 participants aged 30-79 years from China Kadoorie Biobank (CKB). A linear mixed model was used under an additive model. Replication was conducted in 37,251 Chinese participants from CKB and UK Biobank. We conducted LD score regression to quantify genetic correlations across RHR and 11 cardiometabolic traits.

**Results:** Only 50 previously reported variants were replicated in CKB ( $=0.025$ ). We identified ten novel loci associated with RHR ( $P < 5 \times 10^{-8}$ ), of which 50 candidate genes were prioritized. RHR

showed significant genetic correlations with diastolic blood pressure ( $r_g=0.258$ ,  $P=5.71 \times 10^{-10}$ ), mean arterial pressure ( $r_g=0.225$ ,  $P=3.08 \times 10^{-8}$ ), systolic blood pressure ( $r_g=0.170$ ,  $P=4.92 \times 10^{-5}$ ), plasma glucose ( $r_g=0.197$ ,  $P=0.003$ ), total cholesterol ( $r_g=0.287$ ,  $P=0.012$ ), and high-density lipoprotein ( $r_g=0.246$ ,  $P=0.030$ ).

**Conclusions:** We identified ten novel loci associated with RHR in a large Asian cohort. The identified genetic correlations of RHR with blood pressure, glucose, and lipids indicate previously reported association of RHR with risk of all-cause death might be mediated via its correlations with cardiometabolic traits.

**Key messages:**

- Ten novel loci associated with RHR were identified in the Chinese population.
- RHR showed significant genetic correlations with blood pressure, glucose and lipids.
